1     **SARS-CoV-2 Reinfection in Patients Negative for Immunoglobulin G Following**  
2                                   **Recovery from COVID-19**

3             **Ayad M. Ali<sup>1,2</sup>, Kameran Mohammed Ali<sup>3</sup>, Mohammed Hassan Fatah<sup>3</sup>, Hassan Mohammad**  
4                                   **Tawfeeq<sup>3</sup>, Hassan Muhammad Rostam<sup>4,5\*</sup>**

5     <sup>1</sup> Department of Chemistry, *College of Science, University of Garmian, Kalar, Kurdistan region, Iraq*

6     <sup>2</sup> COVID-19 Laboratory, *Qala Hospital, Garmian General Directorate of Health, Ministry of Health,*  
7     *Kalar, Kurdistan Region, Iraq*

8     <sup>3</sup>Medical Lab Technology Department, *Kalar Technical Institute, Sulaimani Polytechnic University,*  
9     *Kalar, Kurdistan Region, Iraq*

10    <sup>4</sup>*School of Life Sciences, University of Nottingham, NG7 2RD, UK*

11    <sup>5</sup>*College of Medicine, University of Garmian, Kalar, Kurdistan region, Iraq*

12    \*Corresponding author: [Hassan.al-bewani2@nottingham.ac.uk](mailto:Hassan.al-bewani2@nottingham.ac.uk)

13    **Abstract**

14    While many patients infected by severe acute respiratory syndrome coronavirus 2 (SARS-  
15    CoV-2) eventually produce neutralising antibodies, the degree of susceptibility of previously  
16    infected individuals to reinfection by SARS-CoV-2 is currently unknown. To better  
17    understand the impact of the immunoglobulin (IgG) level on reinfection in recovered  
18    coronavirus disease 2019 (COVID-19) patients, IgG levels against SARS-CoV-2 were  
19    measured in 829 patients with previously confirmed infection just after their recovery.  
20    Notably, 87 of these patients had no detectable IgG concentration. While there was just one  
21    case of asymptomatic reinfection 4.5 months after the initial recovery amongst patients with  
22    detectable IgG levels, 25 of the 87 patients negative for IgG were reinfected within one to  
23    three months after their first infection. Therefore, patients who recover from COVID-19 with  
24    no detectable IgG concentration appear to remain more susceptible to reinfection by SARS-  
25    CoV-2, with no apparent immunity. Also, although our results suggest the chance is lower,

26 the possibility for recovered patients with positive IgG findings to be reinfected similarly  
27 exists.

28 **Keywords:** COVID-19, SARS-CoV-2, reinfection, immunoglobulin G

## 29 **Introduction**

30 Coronavirus disease 2019 (COVID-19) is an infectious disease caused by a novel  
31 coronavirus, severe acute respiratory syndrome coronavirus 2 (SARS-CoV-2), which was  
32 named so given the similarity of its symptoms to those induced by severe acute respiratory  
33 syndrome [1]. Since the first reports of a viral pneumonia of unknown origin emerged from  
34 China in late 2019, this disease has spread across the world, with new cases reported daily.  
35 The clinical manifestations of COVID-19 range widely from asymptomatic to mild, moderate  
36 and rapidly progressive severe (pneumonia) disease that can lead to death in some  
37 individuals [2-4]. The moderate clinical symptoms of patients with COVID-19 include fever,  
38 dyspnoea, fatigue, dry cough, myalgia and pneumonia. In severe cases, affected patients  
39 may experience acute respiratory failure, septic shock and organ failure that might culminate  
40 in death [5, 6].

41 Transmission of SARS-CoV-2 from infected people to others is suggested based on  
42 epidemiology and clinical evidence [7, 8], with even asymptomatic infected individuals  
43 believed to be capable of transmitting the virus [9, 10].

44 Infection by SARS-CoV-2 leads to a detectable immune response, but the susceptibility of  
45 previously infected individuals to reinfection by SARS-CoV-2 is not well understood given the  
46 brevity of the worldwide pandemic to date. Generally, infection results in the generation of  
47 neutralising antibodies in patients [11] [12]. SARS-CoV2 has the capacity to escape innate  
48 immune responses, which allows the pathogen to produce large numbers of copies in  
49 primarily infected tissues, usually airway epithelia [13]. Principally, patients who recover from  
50 infectious diseases are usually immunised henceforth against infection by the causative  
51 virus; however, reinfection by respiratory viruses is extremely common among humans of all

52 ages due to these viruses' progressive evolution through RNA genome mutations that lead  
53 to antigenic drift and immune escape. However, the complete mechanisms governing our  
54 susceptibility to recurrent viral infections remain poorly understood [14, 15]. Although some  
55 studies indicate the persistence of protective immunoglobulin IgG levels in the blood, saliva  
56 and other body fluids for months after infection with SARS-CoV-2 [16, 17], limited numbers  
57 of case studies of patients with COVID-19 have reported positive test results after the  
58 disease symptoms had resolved and negative test results were recorded, supporting the  
59 possibility of reinfection [18-20]. These reports included both patients with mild disease [21,  
60 22]and others with more severe conditions [20, 23].

61 This study aimed to report an additional group of COVID-19 patients who were reinfected by  
62 SARS-CoV-2 and argue that the IgG level is a potential marker of the reinfection risk.

## 63 **Materials and Methods**

### 64 ***Study population***

65 The study included a group of 829 patients admitted to Qala Hospital, Kalar, Kurdistan  
66 region, Iraq from the last week of May until the middle of October.

### 67 ***Real-time reverse-transcription polymerase chain reaction (RT-PCR) assay for the*** 68 ***diagnosis of SARS-CoV-2***

69 Pharyngeal swabs were administered to extract SARS-CoV-2 RNA from each patient; then,  
70 the total RNA was extracted using the AddPrep Viral Nucleic Acid Extraction Kit (Addbio Inc.,  
71 Daejeon, South Korea). Next, The presence of the SARS-CoV-2 virus was detected by real-  
72 time RT-PCR amplification of the SARS-CoV-2 open reading frame 1ab (ORF1ab) and  
73 envelope (E) gene fragments. The amplification reactions were carried out with 10 µL of 2X  
74 RT-PCR mastermix, 5 µL of primer/probe mix and 5 µL of template RNA for a final volume of  
75 20 µL using the PowerChek SARS-CoV-2 Real-time PCR Kit (Kogenebiotech, Seoul,  
76 Korea), described previously [24]. We followed the kit's instructions and adopted the  
77 following thermocycler protocol: 50°C for 30 minutes and 95°C for 10 minutes, followed by

78 40 cycles of 95°C for 15 seconds and 60°C for one minute. When findings regarding the two  
79 target genes (ORF1ab, E) were positive according to specific real-time RT-PCR, a sample  
80 was defined as positive if the viral genome was detected at the cycle threshold value (Ct-  
81 value) of 36.7 or less, while the Ct-value of greater 36.7 was defined as indicating a negative  
82 test result or recovery (i.e., disappearance of signs and symptoms in a previously RT-PCR  
83 positive patient).

#### 84 ***Enzyme-linked Immunosorbent Assay***

85 A serum sample was collected from patients with a confirmed SARS-CoV-2 RT-PCR test  
86 result just after their recovery.

87 The anti-SARS-CoV-2 IgG antibody level was assessed using a commercially available  
88 SARS-CoV-2 IgG test kit (Pishtaz Teb Diagnostics, Tehran, Iran) targeting the nucleocapsid  
89 (N) antigen of the SARS-CoV-2 virus. Sera were diluted 1:101. First, 10 µL of the specimen  
90 together with 1,000 µL of the sample diluent was processed in a 96-well test kit. Then, 100  
91 µL of each control serum and diluted specimens were placed into the appropriate well, with  
92 the first two wells chosen as blanks and the next two chosen as negative control wells.  
93 Positive controls were used as duplicates and the other wells were used for samples. Based  
94 on the manufacturer's formula; the following cutoffs were applied: 1.1, positive; 0.9 to 1.1,  
95 equivocal; and less than 0.9, negative.

#### 96 ***Ethics declarations***

97 All methods were used in accordance with relevant guidelines and regulations. Also, we  
98 confirmed that all experimental protocols were approved by the Ethics Licensing Committee  
99 of the Kalar Technical Institute at the Sulaimani Polytechnic University (no. 02 on  
100 01/08/2020). In addition, informed consent was obtained from all study participants or a  
101 parent and/or legal guardian if the individual was younger than 18 years of age.

102

103 **Results**

104 Our study found that 87 patients tested negative for IgG specific to SARS-CoV-2 after  
105 recovery among a population of 829 patients who were infected with SARS-CoV-2 for the  
106 first time. Twenty-six patients (14 male and 12 female patients, aged 10–60 years old) were  
107 reinfected after recovery; of these, 25 patients were in the IgG-negative group and only one  
108 patient was IgG-positive (Figure 1).

109 Just after recovery, IgG antibodies against the SARS-CoV-2 were found in the serum of  
110 most of the reinfected patients. Only one patient was reinfected even though his IgG result  
111 remained positive after recovery from COVID-19 (Table 1). Most IgG-negative patients  
112 presented with just a couple of signs of COVID-19, including fever (96%) and myalgia (68%)  
113 and continued cough (< 15% cases), while reinfected patients suffered more signs including  
114 fever (96%), myalgia (88%), continuous cough (88%) and loss of taste and smell together  
115 (72%). In addition, after reinfection more than 95% of the reinfected COVID-19 patients had  
116 been immunised as evidenced by IgG antibody induction. Surprisingly, there was no  
117 detectable IgG concentration in a male patient who had most of the common signs and  
118 symptoms of COVID-19 during both his first infection and reinfection. Also, a male patient  
119 (no. 26 in Tables 1 and 2) showed serum IgG level of 5.87 s/ca against SARS-CoV-2 after  
120 recovery but was reinfected 138 days later. Interestingly, the reinfection induced his immune  
121 system to produce IgG level by amount (2.08 s/ca) less than the first infection. The  
122 occurrence of reinfection in the group ranged from 26 to 138 days after recovery from the  
123 initial infection (Table 2).

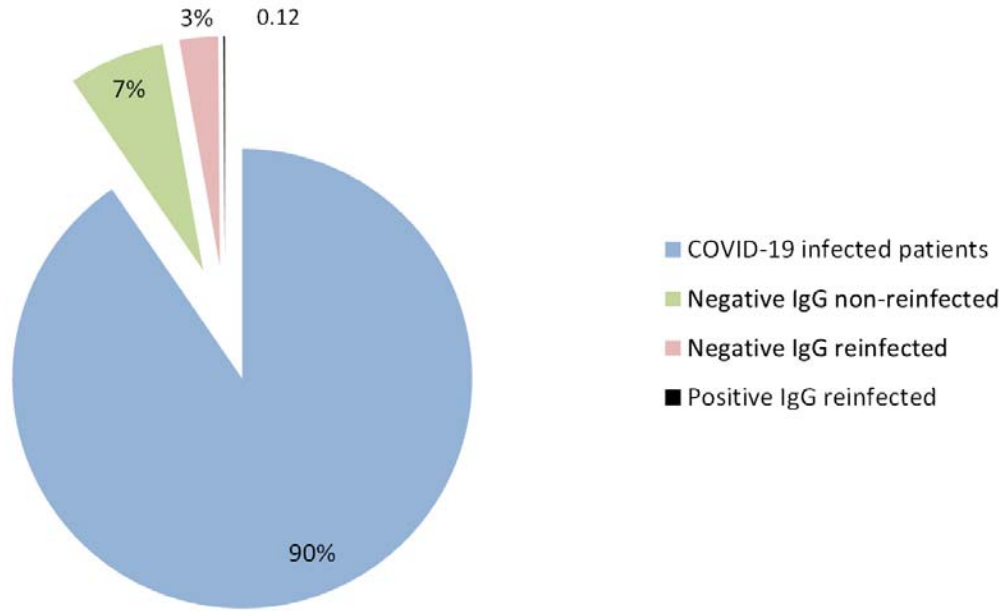

124

125 **Figure 1:** Patients with COVID-19. Among a total of 829 patients with COVID-19, 87 (10%) showed  
126 negative findings for IgG specific to SARS-CoV-2. Twenty-five (3%) patients were reinfected during  
127 the study period, while 62 (7%) patients remained healthy. A single patient with IgG positivity was  
128 reinfected.(0%)**Table 1:** COVID-19 data of the 26 reinfected patients in this study

129

130

131

132

133

134

135

136

137

138

| No. | Gender | Age range (years) | Infected COVID-19 patients                              |                           | Reinfected COVID-19 patients         |                           |
|-----|--------|-------------------|---------------------------------------------------------|---------------------------|--------------------------------------|---------------------------|
|     |        |                   | Date of positive RT-PCR result for SARS-CoV-2 infection | IgG (s/ca) after recovery | Reinfection after (days of) recovery | IgG (s/ca) after Recovery |
| 1   | M      | 20s               | Jul                                                     | Negative                  | 89                                   | 6.7                       |
| 2   | F      | 30s               | Aug                                                     | Negative                  | 55                                   | 10.3                      |
| 3   | M      | 20s               | Sep                                                     | Negative                  | 26                                   | 7.3                       |
| 4   | F      | 10s               | Aug                                                     | Negative                  | 37                                   | 9.3                       |
| 5   | M      | 40s               | Aug                                                     | Negative                  | 55                                   | 15.5                      |
| 6   | F      | 40s               | Sep                                                     | Negative                  | 39                                   | 10.7                      |
| 7   | F      | 40s               | Aug                                                     | Negative                  | 42                                   | 11.3                      |
| 8   | M      | 50s               | Aug                                                     | Negative                  | 46                                   | 10.3                      |
| 9   | F      | 50s               | Aug                                                     | Negative                  | 53                                   | 5.35                      |
| 10  | F      | 40s               | Aug                                                     | Negative                  | 35                                   | 11.2                      |
| 11  | M      | 40s               | Jul                                                     | Negative                  | 76                                   | 7.22                      |
| 12  | F      | 40s               | Aug                                                     | Negative                  | 45                                   | 11.2                      |
| 13  | M      | 40s               | Aug                                                     | Negative                  | 34                                   | 7.4                       |
| 14  | M      | 40s               | Aug                                                     | Negative                  | 50                                   | 12.51                     |
| 15  | F      | 40s               | Aug                                                     | Negative                  | 42                                   | 11.5                      |
| 16  | M      | 40s               | Aug                                                     | Negative                  | 62                                   | 7.11                      |
| 17  | F      | 40s               | Aug                                                     | Negative                  | 49                                   | 8.37                      |
| 18  | M      | 40s               | Jul                                                     | Negative                  | 72                                   | 5.11                      |
| 19  | F      | 30s               | Aug                                                     | Negative                  | 40                                   | 10.3                      |
| 20  | M      | 30s               | Aug                                                     | Negative                  | 59                                   | 6.3                       |
| 21  | M      | 40s               | Aug                                                     | Negative                  | 42                                   | Negative                  |
| 22  | M      | 50s               | Aug                                                     | Negative                  | 53                                   | 9.3                       |
| 23  | M      | 20s               | Aug                                                     | Negative                  | 49                                   | 7.25                      |
| 24  | F      | 40s               | Aug                                                     | Negative                  | 52                                   | 6.21                      |
| 25  | F      | 20s               | Aug                                                     | Negative                  | 54                                   | 11.9                      |
| 26  | M      | 30s               | May                                                     | 5.87                      | 138                                  | 2.08                      |

139 .

140

141

142

143

144

145

146 **Table 2:** Sign and symptoms among all reinfected patients during both infection and reinfection

| No. | Gender | Age range (years) | First COVID-19 infection |     |    |         |       | COVID-19 reinfection |     |    |         |       |
|-----|--------|-------------------|--------------------------|-----|----|---------|-------|----------------------|-----|----|---------|-------|
|     |        |                   | Fever                    | LTS | SB | Myalgia | Cough | Fever                | LTS | SB | Myalgia | Cough |
| 1   | M      | 20s               |                          |     |    |         |       |                      |     |    |         |       |
| 2   | F      | 30s               |                          |     |    |         |       |                      |     |    |         |       |
| 3   | M      | 20s               |                          |     |    |         |       |                      |     |    |         |       |
| 4   | F      | 10s               |                          |     |    |         |       |                      |     |    |         |       |
| 5   | M      | 40s               |                          |     |    |         |       |                      |     |    |         |       |
| 6   | F      | 40s               |                          |     |    |         |       |                      |     |    |         |       |
| 7   | F      | 40s               |                          |     |    |         |       |                      |     |    |         |       |
| 8   | M      | 50s               |                          |     |    |         |       |                      |     |    |         |       |
| 9   | F      | 50s               |                          |     |    |         |       |                      |     |    |         |       |
| 10  | F      | 40s               |                          |     |    |         |       |                      |     |    |         |       |
| 11  | M      | 40s               |                          |     |    |         |       |                      |     |    |         |       |
| 12  | F      | 40s               |                          |     |    |         |       |                      |     |    |         |       |
| 13  | M      | 40s               |                          |     |    |         |       |                      |     |    |         |       |
| 14  | M      | 40s               |                          |     |    |         |       |                      |     |    |         |       |
| 15  | F      | 40s               |                          |     |    |         |       |                      |     |    |         |       |
| 16  | M      | 40s               |                          |     |    |         |       |                      |     |    |         |       |
| 17  | F      | 40s               |                          |     |    |         |       |                      |     |    |         |       |
| 18  | M      | 40s               |                          |     |    |         |       |                      |     |    |         |       |
| 19  | F      | 30s               |                          |     |    |         |       |                      |     |    |         |       |
| 20  | M      | 30s               |                          |     |    |         |       |                      |     |    |         |       |
| 21  | M      | 40s               |                          |     |    |         |       |                      |     |    |         |       |
| 22  | M      | 50s               |                          |     |    |         |       |                      |     |    |         |       |
| 23  | M      | 20s               |                          |     |    |         |       |                      |     |    |         |       |
| 24  | F      | 40s               |                          |     |    |         |       |                      |     |    |         |       |
| 25  | F      | 20s               |                          |     |    |         |       |                      |     |    |         |       |
| 26  | M      | 30s               |                          |     |    |         |       |                      |     |    |         |       |

147 Dark area, positive; light area, negative.

148 **Discussion**

149 Approximately 90% of recovered COVID-19 patients produce a detectable level of  
 150 IgG [25]. In our study, among 829 infected cases, 742 IgG-positive recovered  
 151 patients were identified. The duration and viral magnitude can play a crucial role in  
 152 inducing the immune system to produce an adequate IgG level [26-28], which can be  
 153 an indicator of the severity of the disease [29]. Therefore, it may be postulated that  
 154 those patients who recovered from SARS-CoV-2 infection with IgG negativity in this  
 155 study were exposed to a lesser amount of viral antigen.



156 The degree of protective immunity conferred by prior infection and the possibility of  
157 reinfection by SARS-CoV-2 is not well understood [20]. This study reports that  
158 around 10% of recovered COVID-19 patients showed no detectable IgG  
159 concentration after recovery and prior to their reinfection. A pair of studies from Hong  
160 Kong and Ecuador have reported SARS-CoV-2 reinfection in two IgG-negative  
161 patients who previously recovered from COVID-19 [21, 22]. The IgG level appears to  
162 be associated with the severity of the illness during the first infection; studies have  
163 shown that patients with mild symptoms had no/lower antibody titers as compared  
164 with those patients with more severe symptoms [21, 29, 30]. In our study, the degree  
165 of disease severity in the reinfection period was worse in most patients than that  
166 during the first instance of COVID-19. A similar case study was reported in a 46-  
167 year-old male Ecuadorian patient [23]. This contradicts with the findings of a couple  
168 of case studies in which patients were asymptomatic during their reinfection period  
169 but were symptomatic during their first infection [21, 22]. The increase in disease  
170 severity in reinfected patients can be due to a high viral load or a change in virus  
171 virulence, which might have facilitated reinfection [20, 31]. The lack of a detectable  
172 level of IgG against SARS-CoV-2 during the infection period in mild or asymptomatic  
173 patients possibly makes them more susceptible to the reinfection. Therefore, in the  
174 current study, it is believed that the vast majority of patients who showed detectable  
175 levels of IgG after COVID-19 were thus protected from reinfection, even though the  
176 time period of the immunity conferred by IgG against SARS-CoV-2 has not been  
177 concluded yet [21]. Unexpectedly, a male patient was reinfected with COVID-19  
178 without inducing IgG production a second time, which raises the question of possible  
179 reinfection for a third time. Also, another male patient had detectable amounts of IgG  
180 during his first infection and was reinfected after 138 days with no symptoms. That

181 may be due to a decrease in his IgG level as time passed as studies have suggested  
182 neutralizing IgG levels start to decrease at six to 13 weeks after infection resolution  
183 [29, 32, 33]. Mysteriously, the reinfection in the aforementioned patient induced a low  
184 level of a detectable serum IgG concentration. This raises questions concerning the  
185 presence of adaptive immunity in COVID-19 patients.

## 186 **Conclusion**

187 To conclude, a lack of IgG in patients who have recovered from COVID-19 may lead  
188 some to become infected. IgG production possibly indicates the severity of the signs  
189 and symptoms of COVID-19. Also, IgG levels against SARS-CoV-2 may decrease  
190 with time. Further studies are needed to consider the efficiency and sustainability of  
191 IgG, which are likely to play a vital role in the success of the COVID-19 vaccine  
192 industry.

## 193 **Author contributions**

194 AMA performed lab work. KMA, MHF, HMT and HMR contributed to writing and  
195 preparing the manuscript.

## 196 **Conflict of interests**

197 We are authors of the article titled ‘Severe Acute Respiratory Syndrome Coronavirus  
198 2 Reinfection in Patients Negative for Immunoglobulin G Following Recovery from  
199 Coronavirus Disease 2019.’ We confirm that we do not have any conflicts of interest  
200 to report for the submitted manuscript.

## 201 **Funding**

202 No funding covered the work

203

## 204   **References**

- 205   [1] Zhu N, Zhang D, Wang W, Li X, Yang B, Song J, et al. A Novel Coronavirus from Patients with  
206   Pneumonia in China, 2019. *New England Journal of Medicine*. 2020;382:727-33.
- 207   [2] Day M. Covid-19: four fifths of cases are asymptomatic, China figures indicate. *BMJ*.  
208   2020;369:m1375.
- 209   [3] Bendavid E, Mulaney B, Sood N, Shah S, Ling E, Bromley-Dulfano R, et al. COVID-19 Antibody  
210   Seroprevalence in Santa Clara County, California. *medRxiv*. 2020:2020.04.14.20062463.
- 211   [4] Wu D, Wu T, Liu Q, Yang Z. The SARS-CoV-2 outbreak: What we know. *International Journal of*  
212   *Infectious Diseases*. 2020;94:44-8.
- 213   [5] Huang C, Wang Y, Li X, Ren L, Zhao J, Hu Y, et al. Clinical features of patients infected with 2019  
214   novel coronavirus in Wuhan, China. *The Lancet*. 2020;395:497-506.
- 215   [6] Chen N, Zhou M, Dong X, Qu J, Gong F, Han Y, et al. Epidemiological and clinical characteristics of  
216   99 cases of 2019 novel coronavirus pneumonia in Wuhan, China: a descriptive study. *The Lancet*.  
217   2020;395:507-13.
- 218   [7] Chan JF-W, Yuan S, Kok K-H, To KK-W, Chu H, Yang J, et al. A familial cluster of pneumonia  
219   associated with the 2019 novel coronavirus indicating person-to-person transmission: a study of a  
220   family cluster. *The Lancet*. 2020;395:514-23.
- 221   [8] Yu P, Zhu J, Zhang Z, Han Y. A Familial Cluster of Infection Associated With the 2019 Novel  
222   Coronavirus Indicating Possible Person-to-Person Transmission During the Incubation Period. *The*  
223   *Journal of Infectious Diseases*. 2020;221:1757-61.
- 224   [9] Zou L, Ruan F, Huang M, Liang L, Huang H, Hong Z, et al. SARS-CoV-2 Viral Load in Upper  
225   Respiratory Specimens of Infected Patients. *New England Journal of Medicine*. 2020;382:1177-9.
- 226   [10] Rothe C, Schunk M, Sothmann P, Bretzel G, Froeschl G, Wallrauch C, et al. Transmission of 2019-  
227   nCoV Infection from an Asymptomatic Contact in Germany. *New England Journal of Medicine*.  
228   2020;382:970-1.
- 229   [11] Ju B, Zhang Q, Ge J, Wang R, Sun J, Ge X, et al. Human neutralizing antibodies elicited by SARS-  
230   CoV-2 infection. *Nature*. 2020;584:115-9.
- 231   [12] Ravioli S, Ochsner H, Lindner G. Reactivation of COVID-19 pneumonia: A report of two cases.  
232   *Journal of Infection*. 2020;81:e72-e3.
- 233   [13] Felsenstein S, Herbert JA, McNamara PS, Hedrich CM. COVID-19: Immunology and treatment  
234   options. *Clinical Immunology*. 2020;215:108448.
- 235   [14] Clohisey S, Baillie JK. Host susceptibility to severe influenza A virus infection. *Critical Care*.  
236   2019;23:303.
- 237   [15] Nogales A, L DeDiego M. Host single nucleotide polymorphisms modulating influenza A virus  
238   disease in humans. *Pathogens*. 2019;8:168.
- 239   [16] Iyer AS, Jones FK, Nodoushani A, Kelly M, Becker M, Slater D, et al. Persistence and decay of  
240   human antibody responses to the receptor binding domain of SARS-CoV-2 spike protein in COVID-19  
241   patients. *Science Immunology*. 2020;5:eabe0367.
- 242   [17] Isho B, Abe KT, Zuo M, Jamal AJ, Rathod B, Wang JH, et al. Persistence of serum and saliva  
243   antibody responses to SARS-CoV-2 spike antigens in COVID-19 patients. *Science Immunology*.  
244   2020;5:eabe5511.
- 245   [18] Chen D, Xu W, Lei Z, Huang Z, Liu J, Gao Z, et al. Recurrence of positive SARS-CoV-2 RNA in  
246   COVID-19: A case report. *International Journal of Infectious Diseases*. 2020;93:297-9.
- 247   [19] Xiao AT, Tong YX, Gao C, Zhu L, Zhang YJ, Zhang S. Dynamic profile of RT-PCR findings from 301  
248   COVID-19 patients in Wuhan, China: A descriptive study. *Journal of Clinical Virology*.  
249   2020;127:104346.
- 250   [20] Tillett RL, Sevinsky JR, Hartley PD, Kerwin H, Crawford N, Gorzalski A, et al. Genomic evidence  
251   for reinfection with SARS-CoV-2: a case study. *The Lancet Infectious Diseases*.

- 252 [21] To KK-W, Hung IF-N, Ip JD, Chu AW-H, Chan W-M, Tam AR, et al. Coronavirus Disease 2019  
253 (COVID-19) Re-infection by a Phylogenetically Distinct Severe Acute Respiratory Syndrome  
254 Coronavirus 2 Strain Confirmed by Whole Genome Sequencing. *Clinical Infectious Diseases*. 2020.  
255 [22] Van Elslande J, Vermeersch P, Vandervoort K, Wawina-Bokalanga T, Vanmechelen B, Wollants E,  
256 et al. Symptomatic SARS-CoV-2 reinfection by a phylogenetically distinct strain. *Clinical Infectious*  
257 *Diseases*. 2020.  
258 [23] Prado-Vivar B, Becerra-Wong M, Guadalupe JJ, Marquez S, Gutierrez B, Rojas-Silva P, et al.  
259 COVID-19 Re-Infection by a Phylogenetically Distinct SARS-CoV-2 Variant, First Confirmed Event in  
260 South America. First Confirmed Event in South America(September 3, 2020). 2020.  
261 [24] Ali KM, Ali AM, Tawfeeq HM, Figueredo G, Rostam HM. Hypoalbuminemia in Severe COVID-19  
262 Post Recovery Patients. 2020.  
263 [25] ECDC. Reinfection with SARS-CoV-2: considerations for public health response. European Centre  
264 for Disease Prevention and Control; 2020.  
265 [26] Liu Y, Yan L-M, Wan L, Xiang T-X, Le A, Liu J-M, et al. Viral dynamics in mild and severe cases of  
266 COVID-19. *The Lancet Infectious Diseases*. 2020;20:656-7.  
267 [27] Zhou F, Yu T, Du R, Fan G, Liu Y, Liu Z, et al. Clinical course and risk factors for mortality of adult  
268 inpatients with COVID-19 in Wuhan, China: a retrospective cohort study. *The Lancet*. 2020;395:1054-  
269 62.  
270 [28] Fourati S, Hue S, Pawlotsky J-M, Mekontso-Dessap A, de Prost N. SARS-CoV-2 viral loads and  
271 serum IgA/IgG immune responses in critically ill COVID-19 patients. *Intensive Care Medicine*.  
272 2020;46:1781-3.  
273 [29] Long Q-X, Tang X-J, Shi Q-L, Li Q, Deng H-J, Yuan J, et al. Clinical and immunological assessment  
274 of asymptomatic SARS-CoV-2 infections. *Nature Medicine*. 2020;26:1200-4.  
275 [30] Robbiani DF, Gaebler C, Muecksch F, Lorenzi JCC, Wang Z, Cho A, et al. Convergent antibody  
276 responses to SARS-CoV-2 in convalescent individuals. *Nature*. 2020;584:437-42.  
277 [31] Guallar MP, Meiriño R, Donat-Vargas C, Corral O, Juvé N, Soriano V. Inoculum at the time of  
278 SARS-CoV-2 exposure and risk of disease severity. *International Journal of Infectious Diseases*.  
279 2020;97:290-2.  
280 [32] Wang X, Guo X, Xin Q, Pan Y, Li J, Chu Y, et al. Neutralizing Antibodies Responses to SARS-CoV-2  
281 in COVID-19 Inpatients and Convalescent Patients. *medRxiv*. 2020:2020.04.15.20065623.  
282 [33] Kissler SM, Tedijanto C, Goldstein E, Grad YH, Lipsitch M. Projecting the transmission dynamics  
283 of SARS-CoV-2 through the postpandemic period. *Science*. 2020;368:860-8.

284
